# Supplementary material for: Estrogen regulates T helper 17 phenotype and localization in experimental autoimmune arthritis
Source: PubMed Central journal article supplement (PMC4355457; doi:10.1186/s13075-015-0548-y), 2015-02-13
Supplement: 13075_2015_548_MOESM1_ESM.pdf [file 13075_2015_548_MOESM1_ESM.pdf]

# SUPPORTING INFORMATION

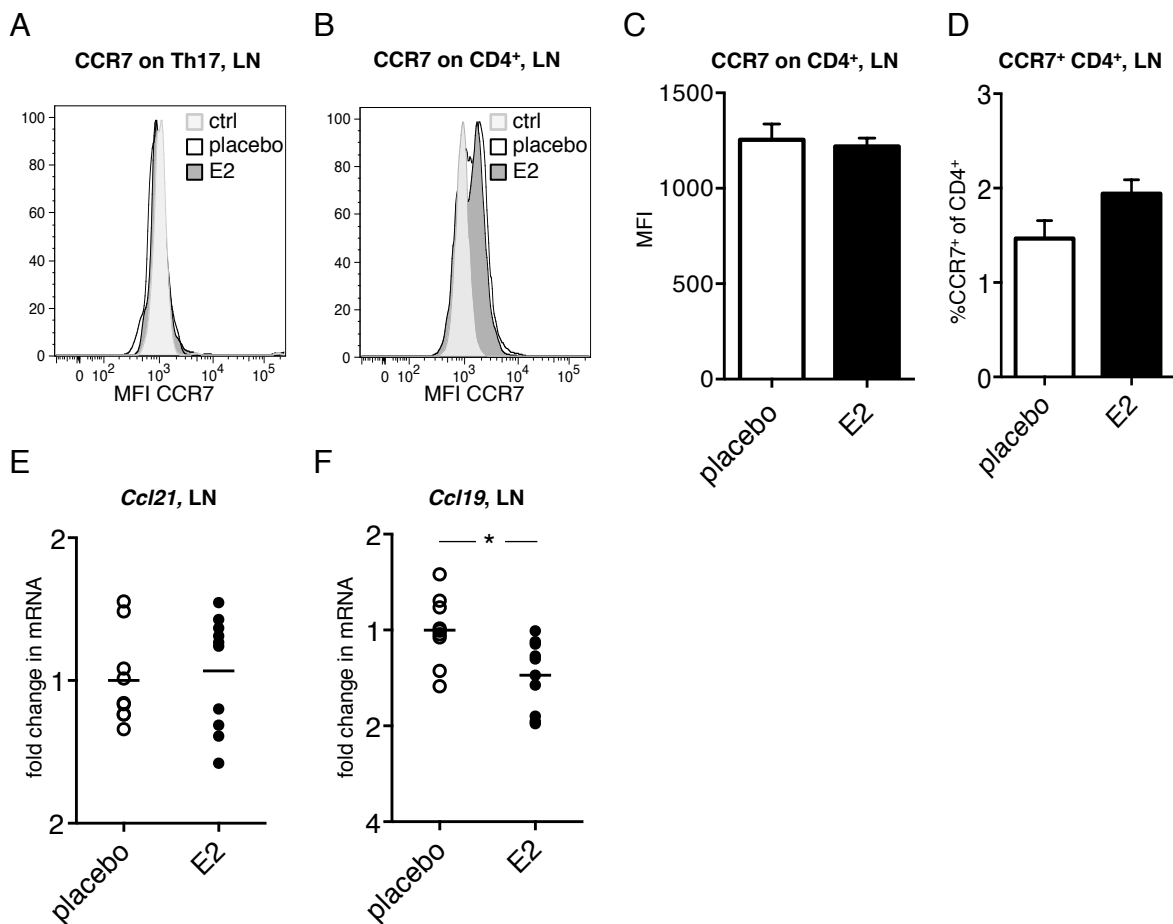

**Figure S1. Expression of CCR7 and corresponding lymph node chemokine mRNA after estrogen treatment.** DBA/1 mice were ovariectomized, subjected to CIA and treated with E2 (0.83  $\mu\text{g}/\text{day}$ ) or placebo. **(A-D)** FACS analysis of CCR7 on lymph node cells from mice with CIA day 14. Representative FACS plots where fluorescence minus one (FMO) is control, showing CCR7 expression on **(A)** Th17 and **(B)** all CD4<sup>+</sup> cells. **(C)** Median fluorescence intensity (MFI) of CCR7 on CD4<sup>+</sup> cells and **(D)** frequency of CCR7<sup>+</sup> cells of CD4<sup>+</sup> cells (single experiments,  $n=9-10$  mice/group). **(E, F)** mRNA expression of chemokines in whole lymph nodes from mice with CIA day 14, **(E)** *Ccl21* and **(F)** *Ccl19* (single experiments,  $n=9-10$  mice/group). Bars or lines show arithmetic mean + SEM (C, D) or geometric mean (E, F). Student's t-test (C, E, F) or Welch's t-test were used (D) (\* $p<0.05$ ).
